# Supplementary material for: Genetic Diversity of Jinshaia sinensis (Cypriniformes, Balitoridae) Distributed Upstream of the Yangtze River
Source: MDPI journal article supplement (doi:10.3390/fishes8020075), 2023-01-28
Supplement: s1 [file s1]

## Supplementary

# Genetic Diversity of *Jinshaia sinensis* (Cypriniformes, Balitoridae) Distributed Upstream of the Yangtze River

**Table S1.** Primers information used in the study.

| Gene | Primer  | Sequence (5' to 3')           | Reference  |
|------|---------|-------------------------------|------------|
| COI  | COI-L   | TCAACCAACCACAAAGACATTGGCAC    | [21]       |
|      | COI-H   | TAGACTTCTGGGTGGCCAAAGAATCA    |            |
| Cytb | L14724  | GACTTGAAAAACCACCGTTG          | [20]       |
|      | H15915  | CTCCGATCTCCGGATTACAAGAC       |            |
|      | cytb 5a | GGTCGGAATGTTAGTCCTC           | This study |
|      | cytb 3a | ACAATGCCCACAACCCTTA           |            |
| RAG1 | RAG1-L  | CTGAGCTGCAGTCAGTACCATAAGATGT  | [19]       |
|      | RAG1-H1 | TGAGCCTCCATGAACTTCTGAAGRTAYTT |            |
|      | RAG1-H2 | CTGAGTCCTTGTGAGCTTCCATRAAYTT  |            |
| RH   | RH-L1   | TACGTGCCTATGTCCAAYGC          | [19]       |
|      | RH-L2   | CNTATGAATAYCCTCAGTACTACC      |            |
|      | RH-H    | TGCTTGTTTCATGCAGATGTAGA       |            |
|      | RH 5a   | GGCGTGGTTAGGAGTCCAT           | This study |
|      | RH 3a   | AGGCTGGCACTGTCATAAA           |            |

**Table S2.** All samples information used in this study and GenBank accession number.

| Species                  | Locations                                                     | Specimens name | GenBank Accession No. |          |          |          |
|--------------------------|---------------------------------------------------------------|----------------|-----------------------|----------|----------|----------|
|                          |                                                               |                | COI                   | Cytb     | RAG1     | RH       |
| <i>Jinshaia sinensis</i> | Lijiang<br>(Yunnan Prov.,<br>26°55'54.71"N,<br>99°57'13.01"E) | Lijiang1       | MW441106              | MW441132 | MW441183 | MW441037 |
|                          |                                                               | Lijiang2       | MW441105              | MW441133 | -        | MW441041 |
|                          |                                                               | Lijiang3       | MW441104              | MW441134 | MW441184 | MW441042 |
|                          |                                                               | Lijiang4       | MW441103              | MW441135 | MW441185 | MW441043 |
|                          |                                                               | Lijiang5       | MW441102              | MW441136 | MW441186 | MW441044 |
|                          |                                                               | Lijiang6       | MW441101              | MW441137 | MW441187 | MW441045 |
|                          |                                                               | Lijiang7       | MW441100              | MW441138 | MW441188 | MW441046 |
|                          |                                                               | Lijiang8       | MW441099              | MW441139 | MW441189 | MW441047 |
|                          |                                                               | Lijiang9       | MW441098              | MW441140 | MW441190 | MW441048 |
|                          |                                                               | Lijiang10      | MW441097              | MW441141 | MW441191 | MW441027 |
|                          |                                                               | Lijiang11      | MW441096              | MW441142 | MW441192 | MW441028 |
|                          |                                                               | Lijiang12      | MW441095              | MW441143 | MW441193 | MW441029 |
|                          |                                                               | Lijiang13      | MW441094              | MW441144 | MW441194 | MW441030 |
|                          |                                                               | Lijiang14      | MW441093              | MW441145 | MW441195 | MW441031 |
|                          |                                                               | Lijiang15      | MW441092              | MW441146 | MW441196 | MW441032 |
|                          |                                                               | Lijiang16      | MW441091              | MW441147 | MW441197 | MW441033 |
|                          |                                                               | Lijiang17      | MW441090              | MW441148 | MW441198 | MW441034 |
|                          |                                                               | Lijiang18      | MW441089              | MW441149 | MW441199 | MW441035 |
|                          |                                                               | Lijiang19      | MW441088              | MW441150 | MW441200 | MW441036 |
|                          |                                                               | Lijiang20      | MW441087              | MW441151 | MW441201 | MW441038 |
|                          |                                                               | Lijiang21      | MW441086              | MW441152 | MW441202 | MW441039 |
|                          |                                                               | Lijiang22      | MW441085              | MW441153 | MW441203 | MW441040 |

|                                                                   |             |           |           |           |          |
|-------------------------------------------------------------------|-------------|-----------|-----------|-----------|----------|
| Panzhihua<br>(Sichuan Prov.,<br>26°31'16.02"N,<br>101°26'19.16"E) | PanzhihuaG1 | MW441077  | MW441154  | -         | MW441051 |
|                                                                   | PanzhihuaC2 | MW441078  | MW441155  | MW441182  | MW441052 |
|                                                                   | PanzhihuaC1 | MW441079  | MW441156  | -         | MW441053 |
|                                                                   | PanzhihuaE2 | MW441080  | -         | -         | MW441054 |
|                                                                   | PanzhihuaE1 | MW441081  | MW441159  | -         | MW441055 |
|                                                                   | PanzhihuaG2 | MW441082  | -         | -         | -        |
|                                                                   | PanzhihuaG3 | MW441083  | MW441160  | -         | -        |
|                                                                   | PanzhihuaG5 | MW441084  | -         | -         | -        |
|                                                                   | /           | -         | JN176976* | JN177046* | -        |
|                                                                   | /           | JN177119* | JN176981* | JN177049* | -        |
|                                                                   | /           | JN177114* | JN176986* | -         | -        |
|                                                                   | /           | JN177120* | JN176979* | JN177052* | -        |
|                                                                   | /           | JN177115* | -         | JN177050* | -        |
|                                                                   | /           | JN177124* | JN176990* | -         | -        |
|                                                                   | /           | JN177118* | JN176983* | JN177048* | -        |
|                                                                   | /           | -         | JN176982* | -         | -        |
| Luzhou<br>(Sichuan Prov.,<br>28°49'07.71"N,<br>105°49'30.43"E)    | Luzhou1     | MW441076  | MW441111  | MW441161  | MW441016 |
|                                                                   | Luzhou2     | MW441075  | MW441112  | MW441162  | MW441019 |
|                                                                   | Luzhou3     | MW441074  | MW441113  | MW441163  | MW441020 |
|                                                                   | Luzhou4     | MW441073  | MW441114  | MW441164  | MW441021 |
|                                                                   | Luzhou5     | MW441072  | MW441115  | MW441165  | MW441022 |
|                                                                   | Luzhou6     | MW441071  | MW441116  | MW441166  | MW441023 |
|                                                                   | Luzhou7     | MW441070  | MW441117  | MW441167  | MW441024 |
|                                                                   | Luzhou8     | MW441069  | MW441118  | MW441168  | MW441025 |
|                                                                   | Luzhou9     | MW441068  | MW441119  | MW441169  | MW441026 |
|                                                                   | Luzhou10    | MW441067  | MW441120  | MW441170  | MW441006 |

---

|          |          |          |          |          |
|----------|----------|----------|----------|----------|
| Luzhou11 | MW441066 | MW441121 | MW441171 | MW441007 |
| Luzhou12 | MW441065 | MW441122 | MW441172 | MW441008 |
| Luzhou13 | MW441064 | MW441123 | MW441173 | MW441009 |
| Luzhou14 | MW441063 | MW441124 | MW441174 | MW441010 |
| Luzhou15 | MW441062 | MW441125 | MW441175 | MW441011 |
| Luzhou16 | MW441061 | MW441126 | MW441176 | MW441012 |
| Luzhou17 | MW441060 | MW441127 | MW441177 | MW441013 |
| Luzhou18 | MW441059 | MW441128 | MW441178 | MW441014 |
| Luzhou19 | MW441058 | MW441129 | MW441179 | MW441015 |
| Luzhou20 | MW441057 | MW441130 | MW441180 | MW441017 |
| Luzhou21 | MW441056 | MW441131 | MW441181 | MW441018 |

---

Note: -, sequence not been successfully amplified or unavailable for download; \*, sequence from NCBI download.

**Table S3.** Gene flow ( $N_m$  : below the diagonal) was evaluated from the values of GammaSt for the *Jinshaia sinensis* populations.

| Genes | Populations | Lijiang | Panzhihua |
|-------|-------------|---------|-----------|
| COI   | Lijiang     |         |           |
|       | Panzhihua   | 15.194  |           |
|       | Luzhou      | 5.853   | 8.676     |
| Cyt b | Lijiang     |         |           |
|       | Panzhihua   | 14.828  |           |
|       | Luzhou      | 6.232   | 5.024     |
| RAG1  | Lijiang     |         |           |
|       | Panzhihua   | 15.582  |           |
|       | Luzhou      | 7.495   | 8.343     |
| RH    | Lijiang     |         |           |
|       | Panzhihua   | 5.617   |           |
|       | Luzhou      | 6.872   | 5.338     |
